# Supplementary material for: Indigenous Microbial Consortia in Biopriming:A Natural Alternative to Chemical Treatments for Enhancing the Growth Dynamics of Cereal Crops
Source: Research Square preprint supplement (doi:10.21203/rs.3.rs-5276922/v1), 2024-12-11
Supplement: Supplementary file 1 [file b96a27e55a552793b45bb033.xlsx]

## Sheet: Sheet1
Paddy								Maize								Wheat
		root 10 min	shoot 10 min
TRET	REP	P.R.F.10.	P.S.F.10.	P.R.F.20.	P.S.F.20.	P.R.F.30.	P.S.F.30.	TRET	REP	MA.R.F.10.	MA.S.F.10.	MA.R.F.20.	MA.S.F.20.	MA.R.F.30.	MA.S.F.30.	TRET	REP	P.R.F.10.	P.S.F.10.	P.R.F.20.	P.S.F.20.	P.R.F.30.	P.S.F.30.
T1	R1	8.1	4	9.5	4.5	9.7	5	T1	R1	10.2	7.1	12	8.3	12.5	9.3	T1	R1	11.2	9.1	13.1	9.2	15.1	10.1
T2	R1	7.2	3.5	9.4	3.6	9.8	4.3	T2	R1	10.5	8	10.1	8.5	13.5	10.3	T2	R1	13.5	7.5	14.2	9.1	16.2	10
T3	R1	9.1	3.9	10.5	4.1	10.6	4.2	T3	R1	13.5	11.1	14.1	11.1	14	12.1	T3	R1	12.5	9.9	14.5	10	17.5	11.9
T4	R1	9.6	3.9	10.9	4.6	11.3	5	T4	R1	13.5	11.5	18.5	12.9	19	13	T4	R1	12	9.5	17	11	19.1	12.1
T5	R1	3.2	3.6	4.1	3.1	4.1	3.1	T5	R1	5.9	4	6.5	4.6	7	5.2	T5	R1	6.4	4.5	7.2	5.1	8.4	6.2
T1	R2	8	4.2	9.4	4.8	9.8	5.2	T1	R2	10.4	7.2	12.1	8.2	12.4	9.2	T1	R2	11.1	9	13.2	9.3	15.2	10
T2	R2	7.5	3.6	9.4	3.5	10.2	4.5	T2	R2	10.4	8.1	10	9.4	14.4	10.3	T2	R2	13.2	7.7	14.2	9.2	16.3	10.2
T3	R2	9.3	3.7	10.3	4.2	10.6	4.4	T3	R2	13.2	11.3	14	12	14.2	12.2	T3	R2	12.4	9.8	14.6	9.9	17.6	10.1
T4	R2	9.4	3.7	10.8	4.5	11.2	5.2	T4	R2	13.4	11.4	18.3	12.8	19.1	12.8	T4	R2	12.3	9.4	17.1	11.2	19	12
T5	R2	3.3	3.53	4.2	3	4.2	3	T5	R2	5.8	4.1	6.4	4.5	7.2	5.3	T5	R2	6.5	4.3	7.1	5.3	8.5	6.1
T1	R3	8.3	4.2	9.4	4.7	9.7	5.1	T1	R3	11.5	7.4	12.2	8.3	12.2	9.1	T1	R3	11.1	9	13.4	9.3	15.2	10.2
T2	R3	7.4	3.7	9.3	3.5	9.9	4.6	T2	R3	10.3	8.2	10.2	9.3	13.3	8.2	T2	R3	13.4	7.9	14.1	9.2	16.4	10.1
T3	R3	9.2	4	10.4	4.2	10.7	4.6	T3	R3	13.4	11.3	13.9	11.1	14.3	12.3	T3	R3	12.5	9.7	14.6	10	17.6	10.2
T4	R3	9.2	3.8	10.8	4.5	11.5	5.3	T4	R3	13.4	11.3	18.4	12.8	19.2	12.9	T4	R3	12.4	9.5	17.2	11.3	19.2	12.1
T5	R3	3.4	3.6	4.2	3.1	4.2	3.1	T5	R3	5.7	4	6.3	4.6	7.1	5.1	T5	R3	6.5	4.3	7.3	5.2	8.5	6.3

## Sheet: phenols
treatment	wheat seed	R1	R2	R3		treatment	wheat seedlings	R1	R2	R3		treatment	rice seeds	R1	R2	R3		treatment	rice seedlings	R1	R2	R3			treatment	maize seeds	R1	R2	R3		treatment	maize seedlings	R1	R2	R3
T1	10	0.3	0.32	0.33		T1	10	0.53	0.52	0.52		T1	10	2	2.1	2		T1	10	6.02	6.3	6.2			T1	10	3.8	3.9	3.94		T1	10	6.5	6.6	6.7
T2	20	0.53	0.55	0.57		T2	20	1.34	1.37	1.36		T2	20	2.37	2.39	2.38		T2	20	6.8	6.56	6.59			T2	20	4.5	4.44	4.35		T2	20	7	7.2	7.1
T3	30	0.88	0.82	0.89		T3	30	2.26	2.27	2.26		T3	30	3.45	3.65	3.33		T3	30	7.6	7.77	7.75			T3	30	5.3	5.5	5.4		T3	30	7.8	7.9	7.9
T4	control	0.177	0.176	0.175		T4	control	0.25	0.23	0.23		T4	control	1.29	1.28	1.27		T4	control	2.54	2.65	2.58			T4	control	1.2	1.2	1.05		T4	control	2.3	2.3	2.4
